# Supplementary material
Source: PubMed Central journal article supplement (PMC4209991)
Supplement: pnas.201416278SI.pdf [file pnas.201416278SI.pdf]

# Supporting Information

Liu et al. 10.1073/pnas.1416278111

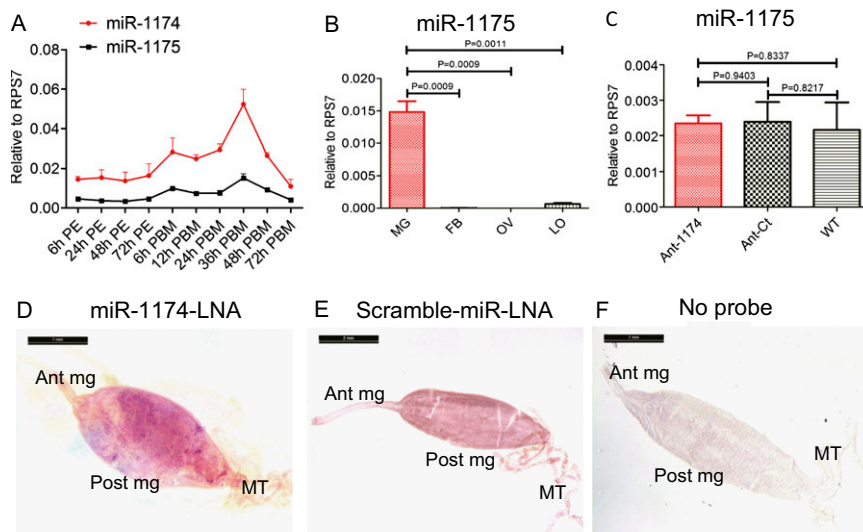

**Fig. S1.** Expression profiles of miR-1174 and miR-1175 in *Aedes aegypti*. (A–C) Quantitative real-time (qRT) PCR. (A) Expression profiles of miR-1174 and miR-1175 in the midgut during reproductive cycles of female *A. aegypti* mosquitoes. PE, h posteclosion; PBM, h post blood meal. (B) Tissue-specific expression of miR-1175. (C) miR-1175 levels in treated, as in B. Error bars depict  $\pm$ SEM (D–F) Whole-mount in situ localization of miR-1174 in the digestive system of the female *Aedes* mosquito. (D) In situ hybridizations using a 5' and 3' digoxigenin (DIG)-labeled locked nucleic acid-modified DNA oligonucleotide (LNA) complementary to miR-1174 (miR-1174-LNA). (E) The Scramble-miR negative control LNA (Scramble-miR-LNA). (F) Control untreated mosquito. The digestive system of female mosquitoes consists of anterior midgut (Ant mg), posterior midgut, and stomach (Post mg). The excretory system attached to the digestive system is represented by the Malpighian tubules (MT).

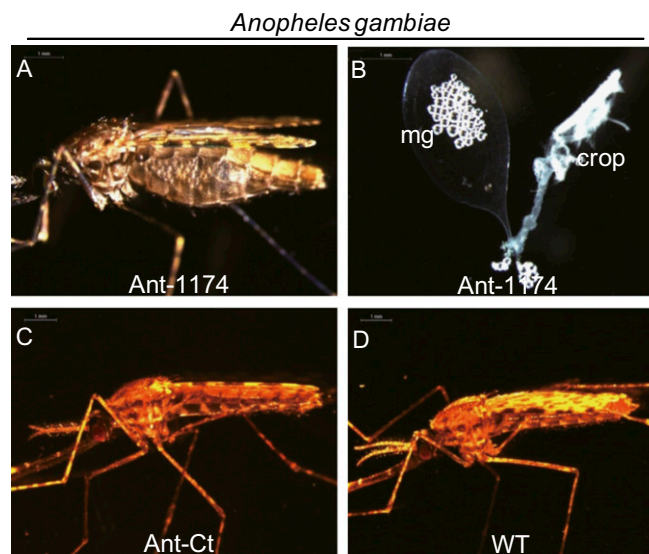

**Fig. S2.** Effect of miR-1174 silencing in female *Anopheles gambiae* mosquitoes maintained on 10% (wt/vol) sugar solution. (A–D) Female *A. gambiae* mosquitoes. (A) A female mosquito with the bloated-abdomen phenotype after Ant-1174 injection. (B) Digestive system isolated from a female mosquito with the bloated-abdomen phenotype. Note an extremely extended crop. mg, midgut. (C) A female mosquito injected with control scramble antagomir probe (Ant-Ct). (D) Untreated WT mosquito.

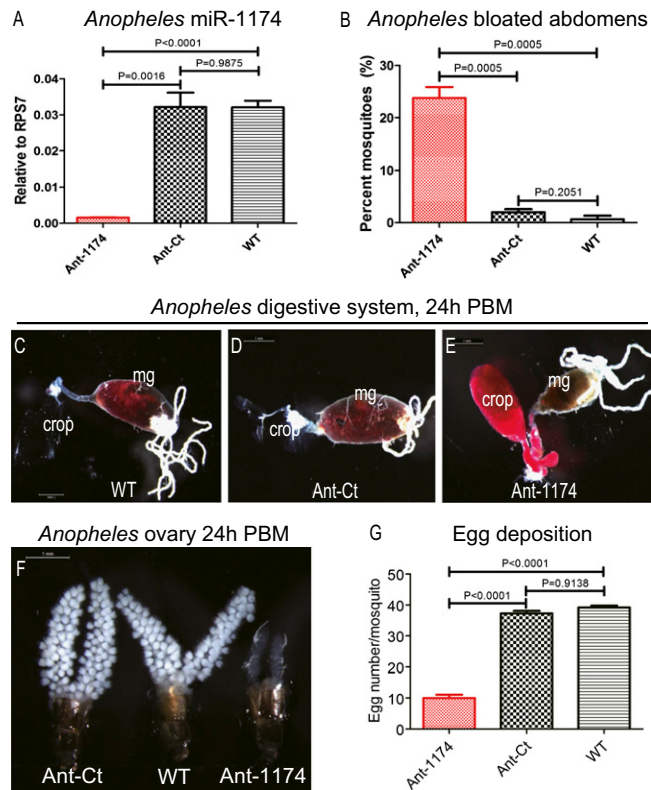

**Fig. S3.** Effect of miR-1174 silencing in female *A. gambiae* mosquitoes. (A) miR-1174 level after antagomir silencing (Ant-1174) compared with the effect of scrambled control antagomir (Ant-Ct) in female *Anopheles* mosquitoes. WT shows miR-1174 level in untreated mosquitoes. qRT-PCR; error bars depict  $\pm$ SEM (B) Percentage of the bloated-abdomen phenotype in female mosquitoes injected with Ant-1174, Ant-Ct, H<sub>2</sub>O, or untreated WT. (C–E) Isolated digestive systems from mosquitoes 24 h after blood-feeding. (C) Untreated WT. (D) Ant-Ct-injected. (E) Ant-1174-injected. mg, midgut. (F) Ovaries isolated 24 h PBM from female mosquitoes injected with Ant-Ct, untreated WT, and Ant-1174. (G) Number of eggs laid by female mosquitoes injected with Ant-1174, Ant-Ct, or untreated WT.

*Aedes aegypti* female mosquitoes

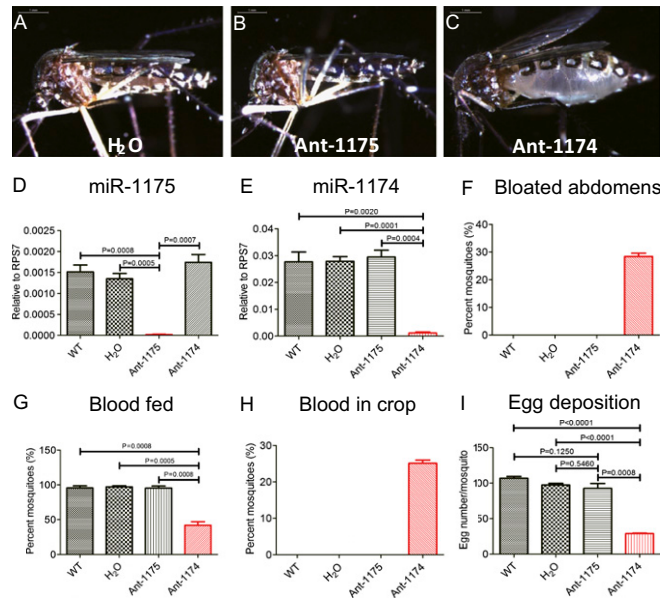

**Fig. 54.** Silencing of miR-1175 does not exhibit any obvious phenotypes in female *A. aegypti* mosquitoes. (A–C) Female mosquitoes injected with H<sub>2</sub>O, Ant-1175, or Ant-1174 and maintained on 10% sugar solution for 3 d. Note the lack of bloated-abdomen phenotype in Ant-1175-injected mosquito. (D) miR1175 levels after injections of H<sub>2</sub>O, Ant-1175, or Ant-1174. miR-1175 level in WT mosquitoes serves as a control. qRT-PCR; error bars depict  $\pm$ SEM. (E) miR-1174 levels after injections of H<sub>2</sub>O, Ant-1175, or Ant-1174. miR-1174 level in WT mosquitoes serves as a control. qRT-PCR; error bars depict  $\pm$ SEM. (F) Percentage of the bloated-abdomen phenotype female mosquitoes injected with H<sub>2</sub>O, Ant-1175, or Ant-1174. WT mosquitoes serve as a control. (G) Percentage of blood-fed mosquitoes after indicated treatments. (H) Percentage of mosquitoes with blood in crop in experiment G. (I) Number of eggs laid by female mosquitoes after indicated treatments.

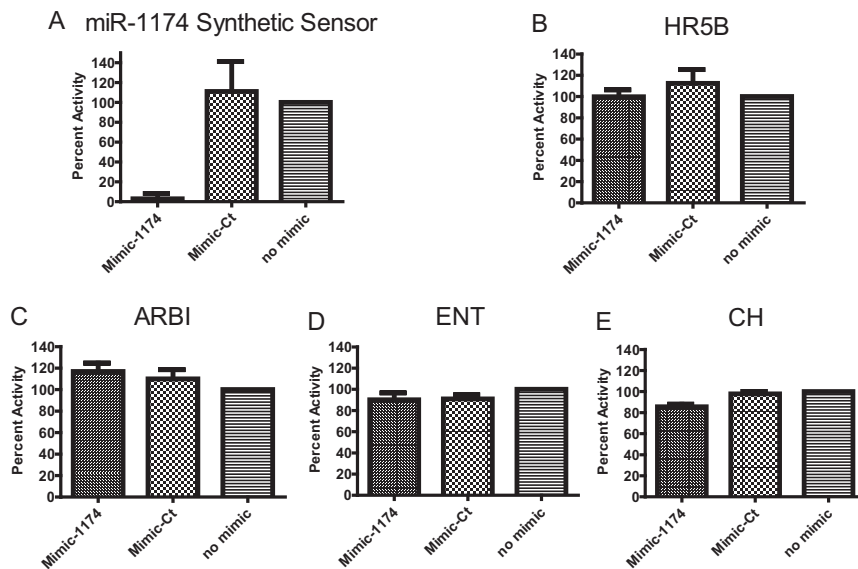

**Fig. 55.** miR-1174 directly targets AAEL002510, Serine hydroxymethyltransferase 3'UTR in vitro. (A) miR-1174 synthetic sensor containing three sites complementary to miR-1174 with four nucleotide linkers between each miR-1174 binding site used as a positive control. (B) AAEL012079, Heat Repeat Containing 5B. (C) EL001779, Apoptosis-related Bax inhibitor. (D) AAEL005411, Equilibrative nucleoside transporter. (E) AAEL010558, Conserved hypothetical. Data represent the percentage activity ( $\Delta$  Fold Activity  $\times$  100) average  $\pm$  SEM of triplicate samples.
